# Supplementary figures and images for: Pre-post synaptic alignment through neuroligin-1 tunes synaptic transmission efficiency
Source: eLife journal article supplement (doi:10.7554/elife.31755), 2018-07-25

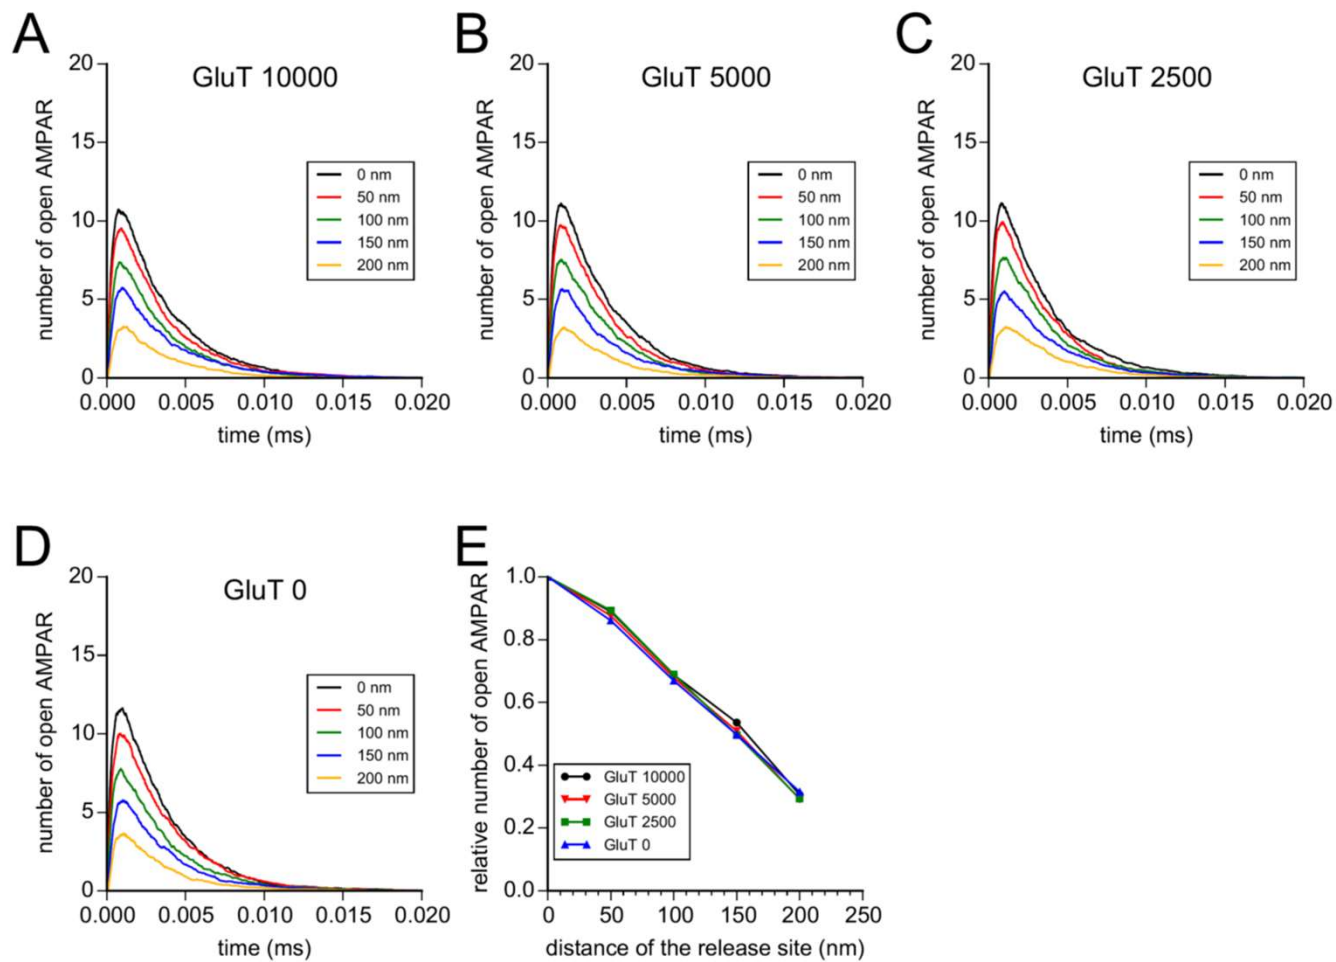

Figure 6- figure supplement 2

Supplement: supp [file elife-31755-supp-v1.zip]

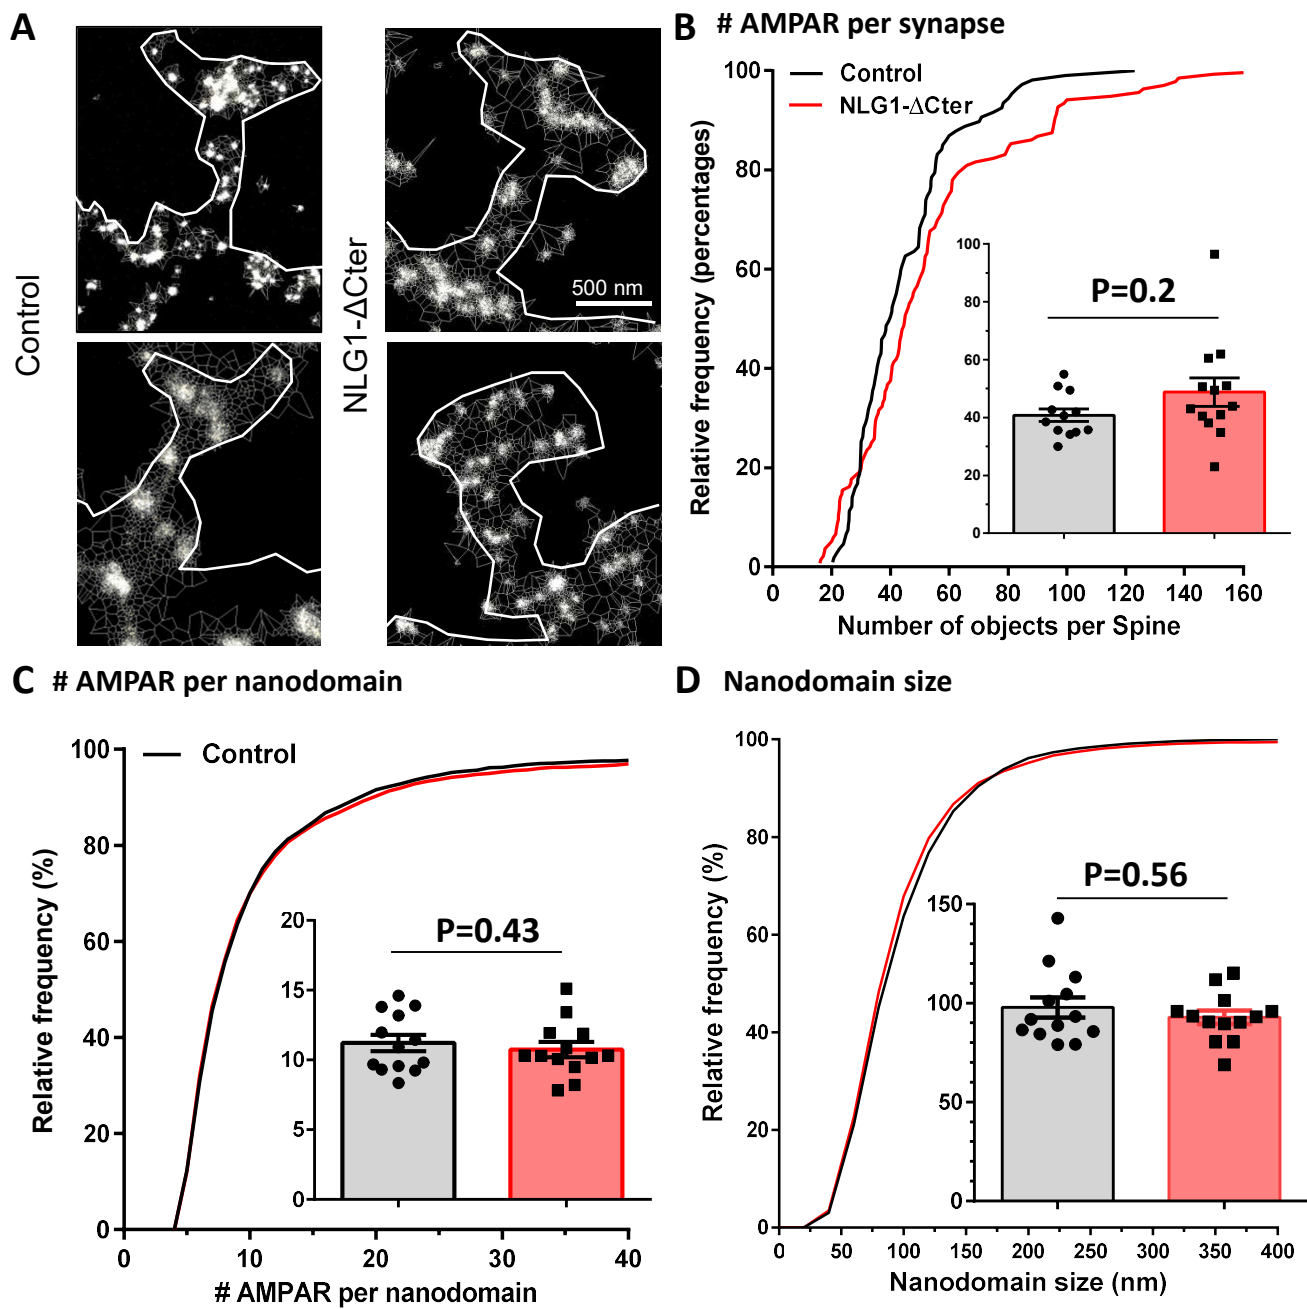

Figure 1- figure supplement 1

Supplement: supp [file elife-31755-supp-v1.zip]

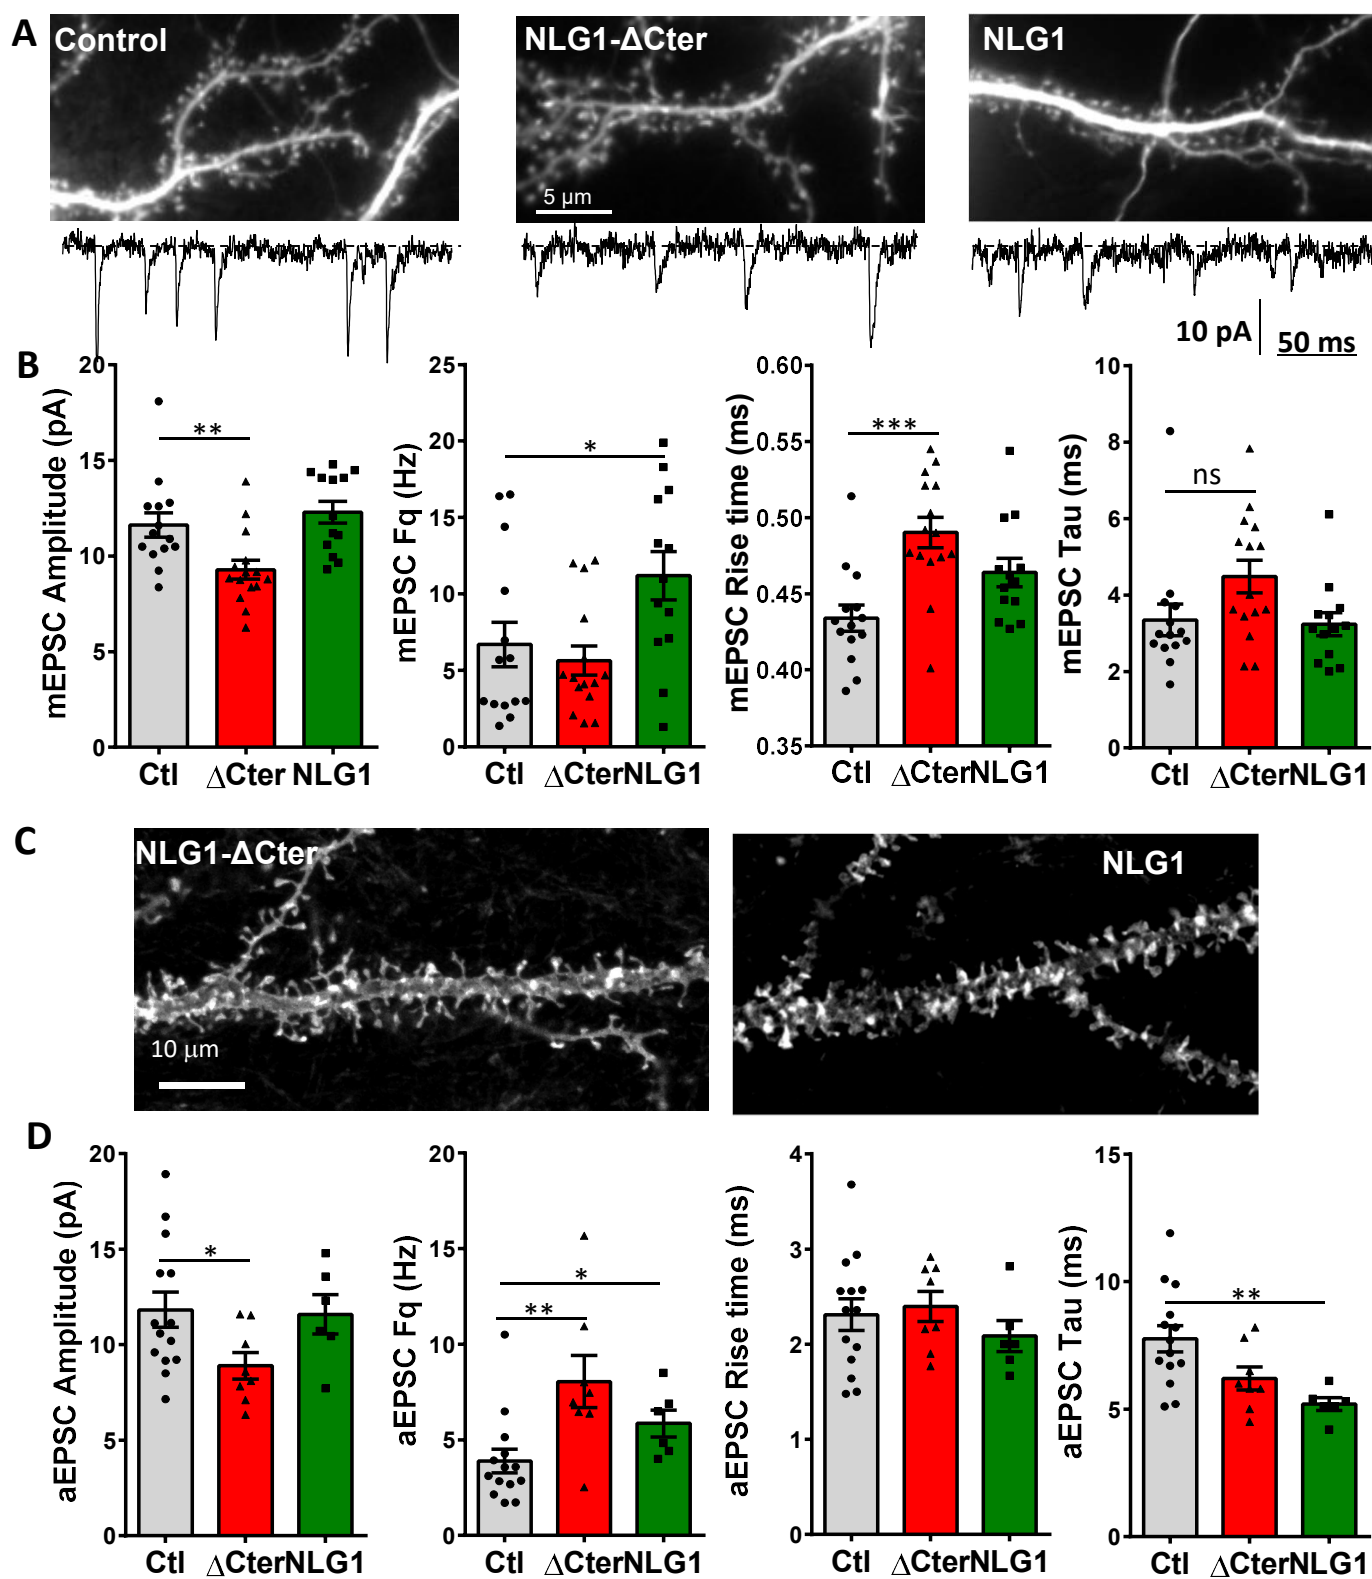

Figure 4- figure supplement 1

Supplement: supp [file elife-31755-supp-v1.zip]

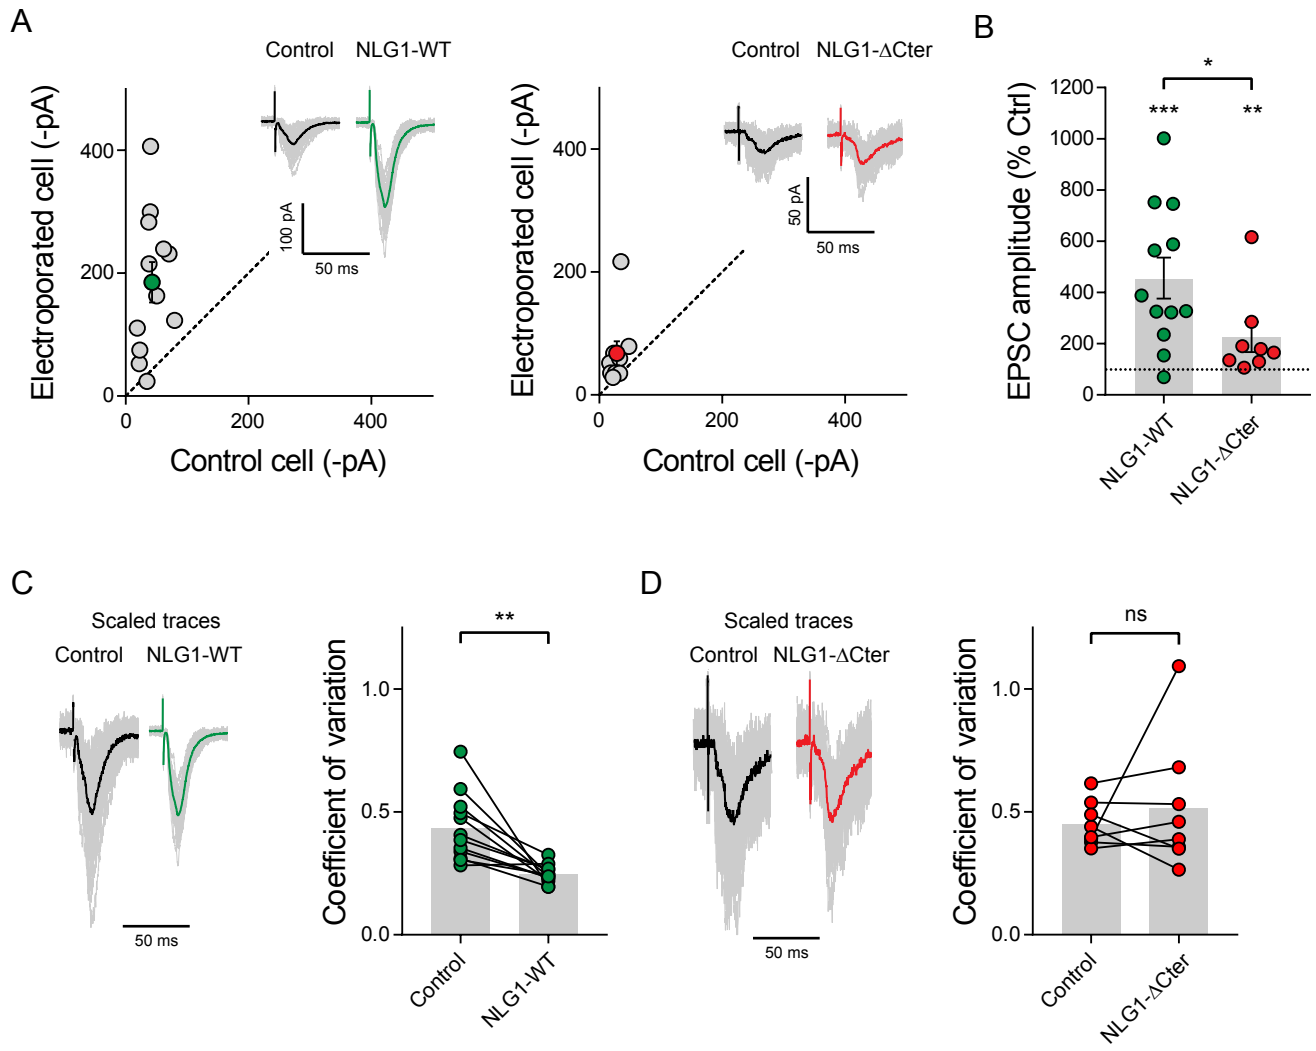

Figure 4- figure supplement 2

Supplement: supp [file elife-31755-supp-v1.zip]

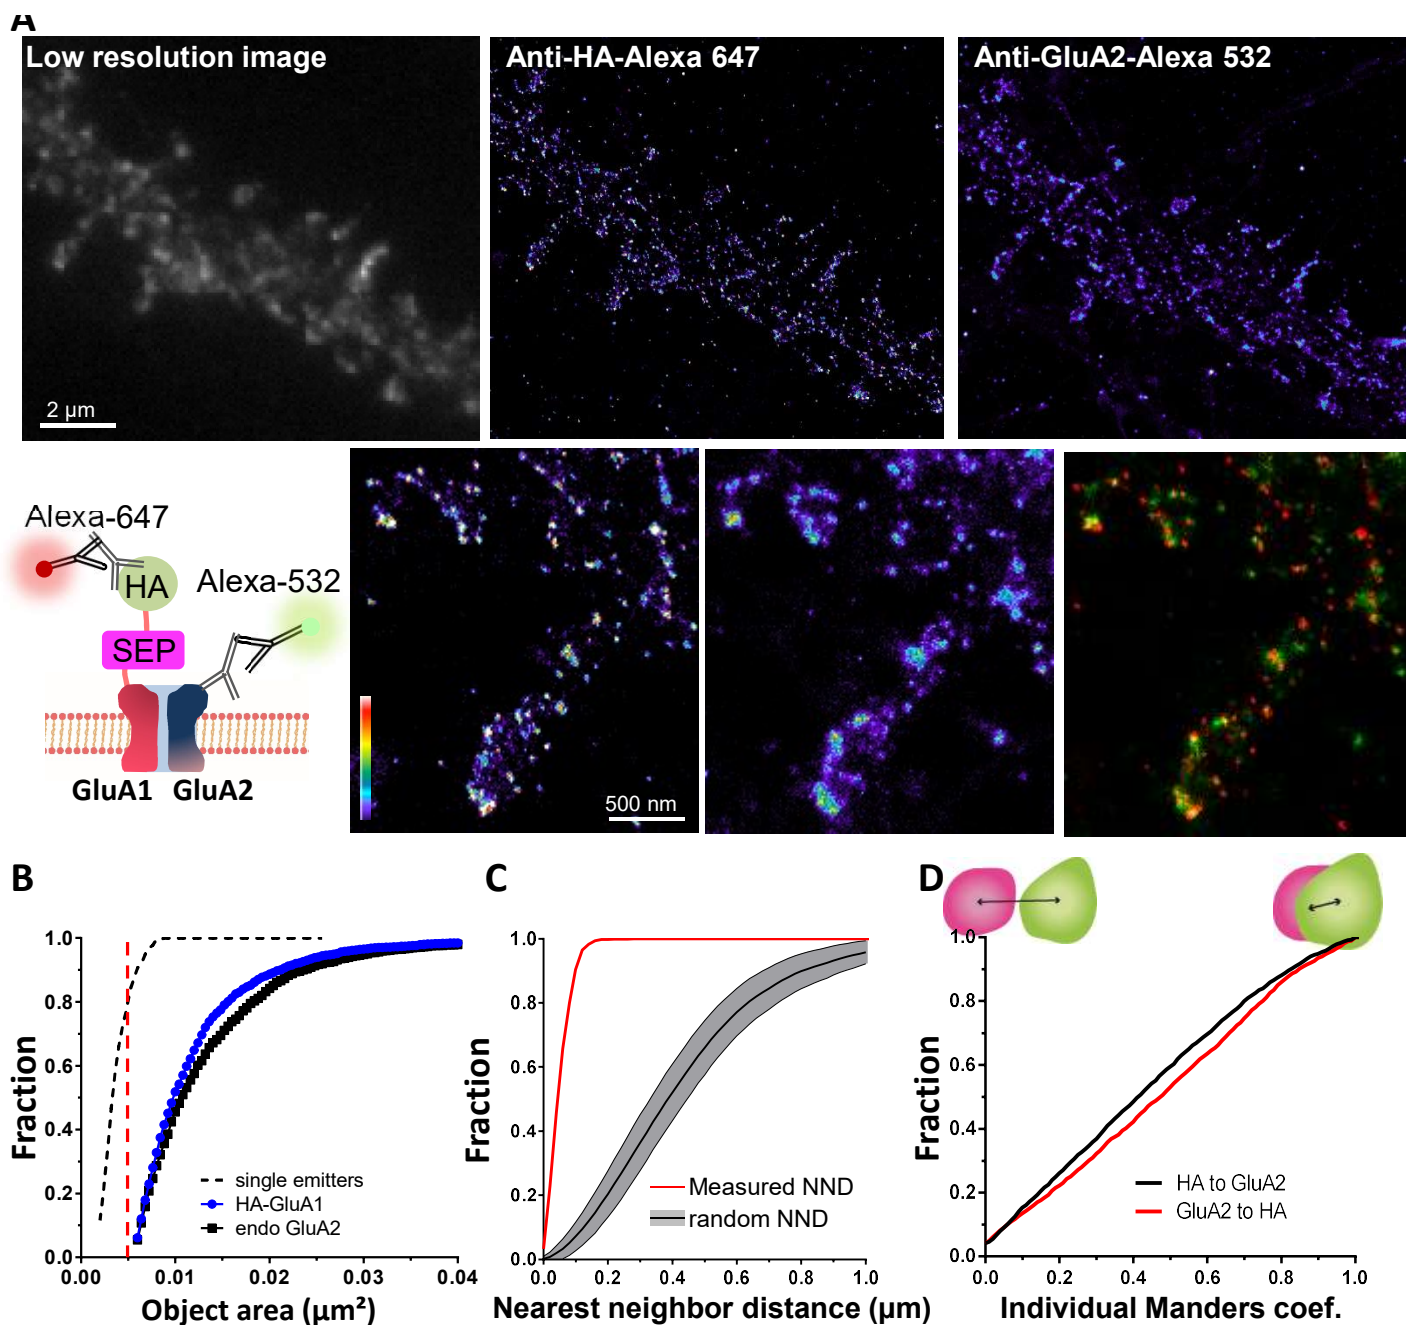

Figure 2- figure supplement 1

Supplement: supp [file elife-31755-supp-v1.zip]

A  $100 \mu\text{m}^2/\text{s}$

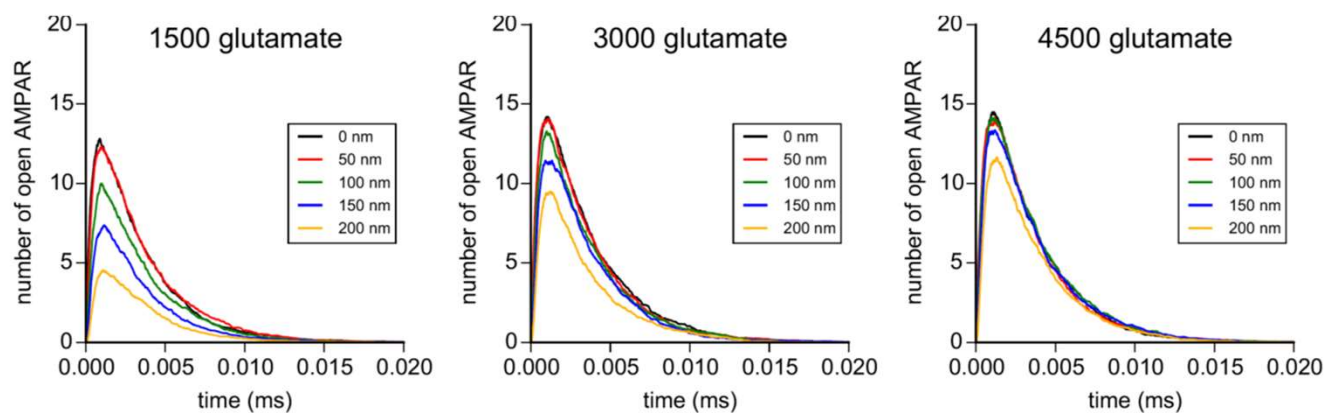

B  $500 \mu\text{m}^2/\text{s}$

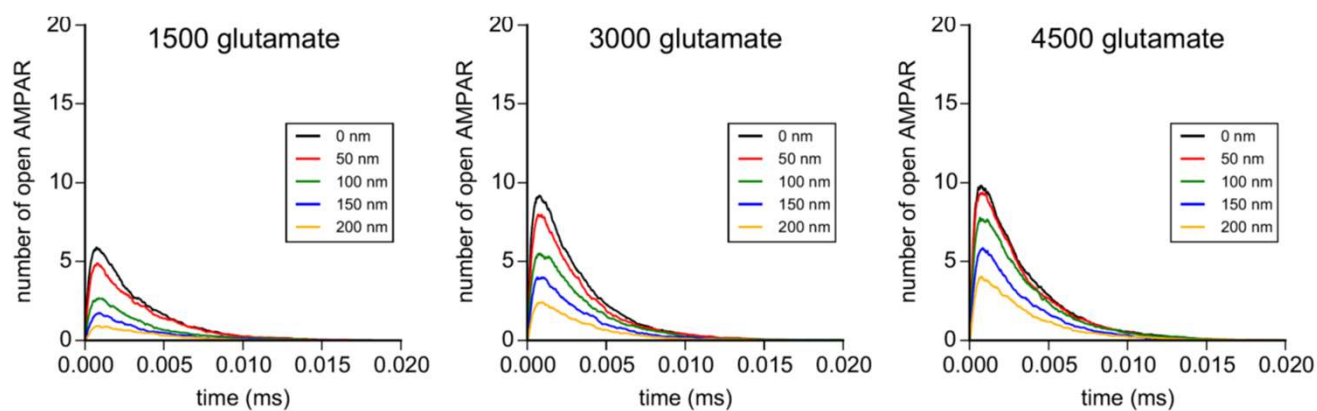

Figure 6- figure supplement 1

Supplement: supp [file elife-31755-supp-v1.zip]

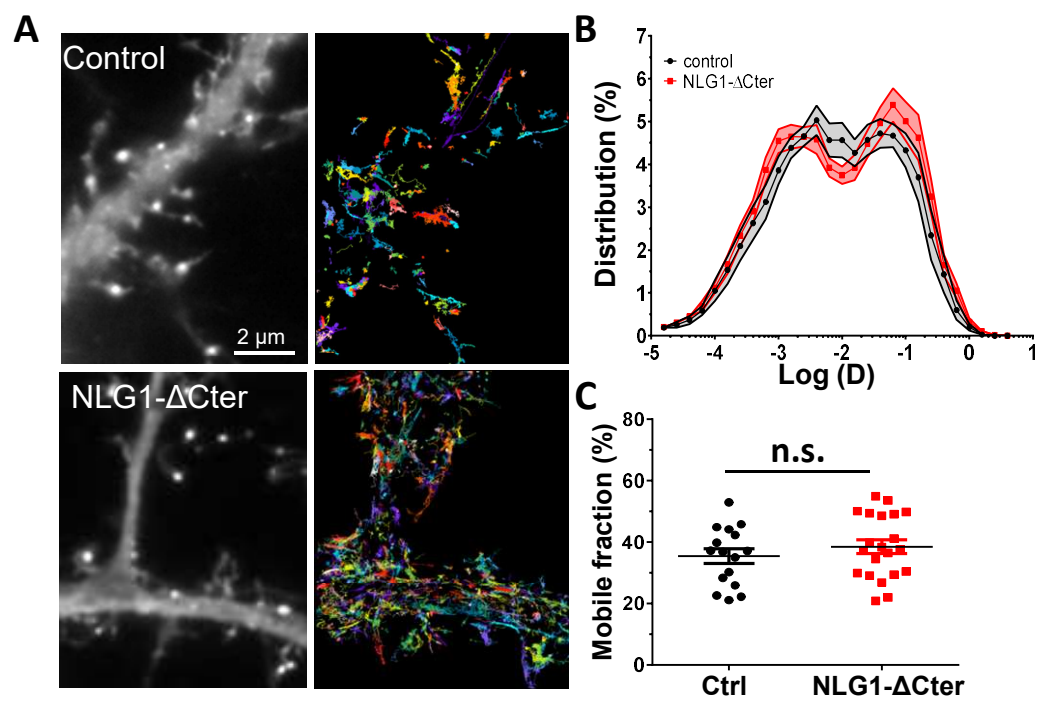

Figure 1- figure supplement 2

Supplement: supp [file elife-31755-supp-v1.zip]

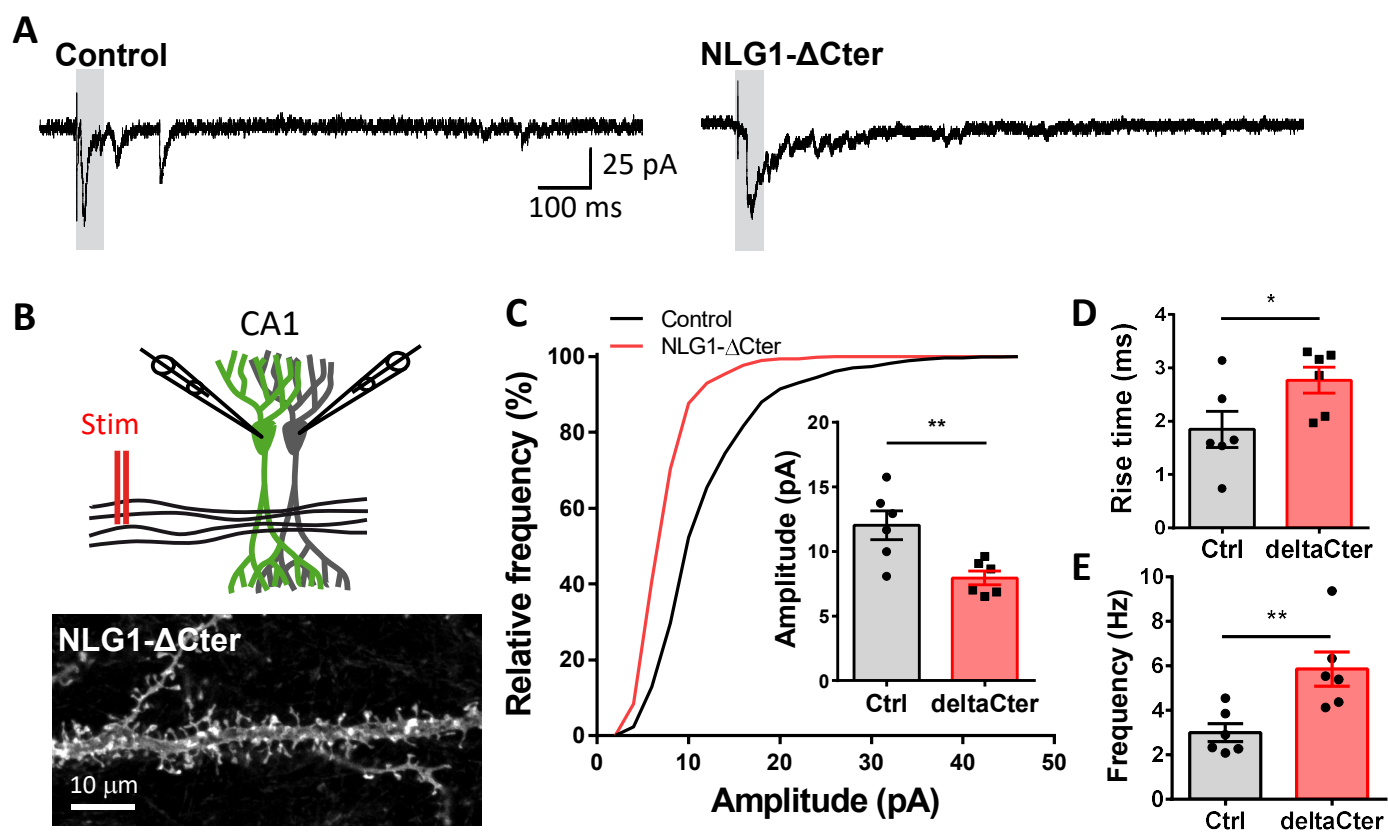

Figure 4- figure supplement 3

Supplement: supp [file elife-31755-supp-v1.zip]

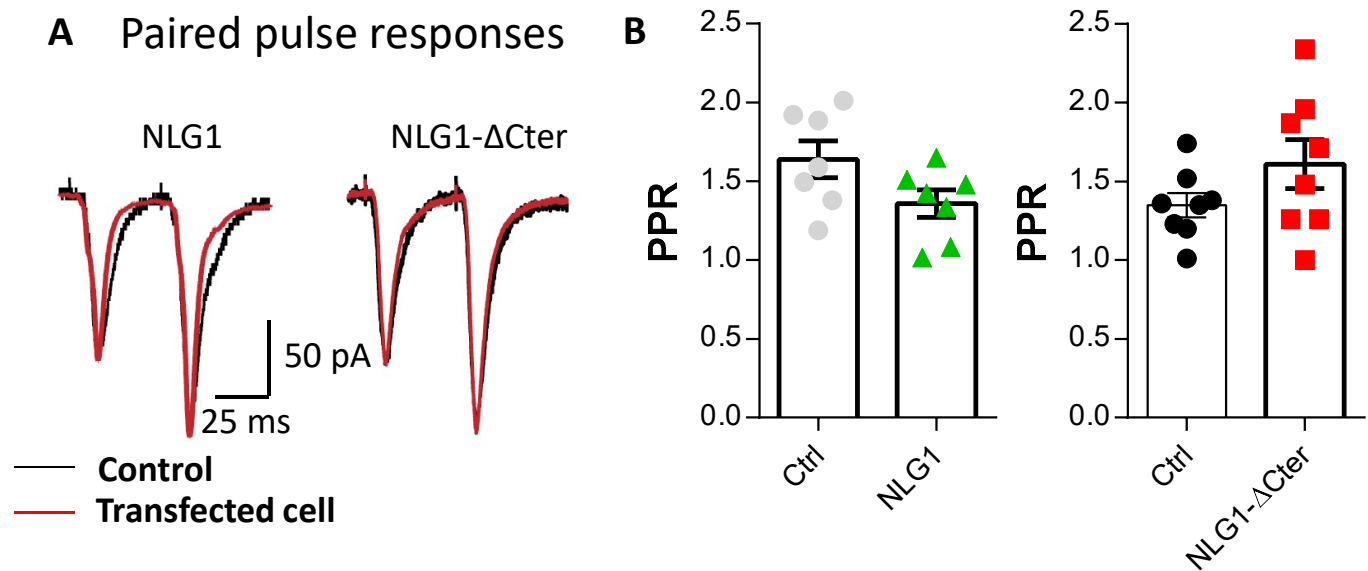

Figure 4- figure supplement 4

Supplement: supp [file elife-31755-supp-v1.zip]
